# Supplementary material
Source: HighWire-hosted journal article supplement (http://cmajopen.ca/highwire/filestream/81067/field_highwire_adjunct_files/2/original-submission.pdf)
Supplement: original-submission.pdf [file original-submission.pdf]

1  
2  
3  
4  
5  
6  
7  
8  
9 **Title:** Regional variability in fecal microbiota transplantation practices: a descriptive study of the  
10 Southern Ontario Fecal microbiota Transplantation (SOFT) Movement  
11

12 **Authors:** Susy S. Hota MD MSc<sup>1,2</sup>, Salman Surangiwalla BSc (C)<sup>3</sup>, Aimee S. Paterson MSc<sup>3</sup>, Bryan  
13 Coburn MD PhD<sup>2,4</sup> and Susan M. Poutanen MD MPH<sup>3,5</sup> for the Southern Ontario Fecal microbiota  
14 Transplantation Movement (SOFT Movement)  
15  
16

17 **SOFT Movement:** B. Coburn MD PhD<sup>2,4</sup>, Nick Daneman MD MSc<sup>2,6</sup>, Mark Downing MD<sup>7</sup>  
18 , Christopher Graham MD<sup>8</sup>, Susy S. Hota MD MSc<sup>1,2</sup>, Jennie Johnstone MD PhD<sup>7,9</sup>, Christine Lee MD  
19 <sup>10,11</sup>, Janine McCready MD<sup>12</sup>, Elaine O. Petrof MD MSc<sup>13,14</sup>, Susan M. Poutanen MD MPH<sup>3,5</sup>, Jeff  
20 Powis MD MSc<sup>2,12</sup>, Daniel Ricciuto MD<sup>15</sup>, and Michael Silverman MD<sup>16,17</sup>.  
21  
22  
23  
24  
25

26 <sup>1</sup>Department of Infection Prevention and Control, University Health Network, Toronto, Canada

27 <sup>2</sup>Department of Medicine, University of Toronto, Toronto, Canada

28 <sup>3</sup>Department of Microbiology, University Health Network/Sinai Health System, Toronto, Canada

29 <sup>4</sup>Toronto General Hospital Research Institute

30 <sup>5</sup>Department of Laboratory Medicine and Pathobiology, University of Toronto, Toronto, Canada

31 <sup>6</sup>Sunnybrook Health Sciences Center, Toronto, Canada

32 <sup>7</sup>St. Joseph's Health Center, Toronto, Canada

33 <sup>8</sup>Trillium Health Partners, Mississauga, Canada

34 <sup>9</sup>Public Health Ontario, Toronto, Canada

35 <sup>10</sup>St. Joseph's Healthcare, Hamilton, Canada

36 <sup>11</sup>McMaster University, Hamilton, Canada

37 <sup>12</sup>Michael Garron Hospital, Toronto, Canada

38 <sup>13</sup>Kingston General Hospital, Kingston, Canada

39 <sup>14</sup>Queen's University

40 <sup>15</sup>Lakeridge Health, Oshawa, Canada

1  
2  
3  
4  
5  
6  
7  
8  
9  
10  
11  
12  
13  
14  
15  
16  
17  
18  
19  
20  
21  
22  
23  
24  
25  
26  
27  
28  
29  
30  
31  
32  
33  
34  
35  
36  
37  
38  
39  
40  
41  
42  
43  
44  
45  
46  
47  
48  
49  
50  
51  
52  
53  
54  
55  
56  
57  
58  
59  
60

<sup>16</sup>St. Joseph's Hospital, London, Canada

<sup>17</sup>Western University, London, Canada

**Keywords:** Fecal microbiota transplantation; recurrent *Clostridium difficile* infection; Canada; survey

**Running Title:** Fecal microbiota transplantation in Ontario, Canada

Dr. Susy Hota (Corresponding Author)

Dr. Susan M. Poutanen (Alternate)

Medical Director, UHN IPAC

Medical Microbiologist / Inf. Diseases Specialist

Assistant Professor, Division of Infectious Diseases

Associate Professor, University of Toronto

University of Toronto

University Health Network/Sinai Health System

8 PMB Rm 103, Toronto General Hospital

Department of Microbiology

200 Elizabeth Street

600 University Avenue, Room 1485

Toronto ON M5G 2C4

Toronto ON M5G 1X5

Office: 416-340-4800 x 7801 or 7287

Office: 416-586-4800 x 3139

Fax: 416-340-5047

Fax: 416-586-8746

Email: [susy.hota@uhn.ca](mailto:susy.hota@uhn.ca)

Email: [spoutanen@mtsinai.on.ca](mailto:spoutanen@mtsinai.on.ca)

### Funding

This work was supported by a Department of Medicine Integrating Challenge Grant and the Department of Laboratory Medicine and Pathobiology at the University of Toronto.

### Potential Competing Interests

S.S. Hota has received a grant and honoraria from serving as a consultant and on the advisory board of Cubist (Merck) pharmaceuticals. S. M. Poutanen has received honoraria related to advisory boards from Merck, Paladin Labs, and Accelerate Diagnostics and honoraria from Merck related to talks. C. Lee is a member of advisory board for Rebiotix and received grants from Merck, Actelion and Rebiotix for clinical research. E.O. Petrof is a co-founder and serves on the Scientific Advisory Board of Nubiyota

1  
2  
3  
4  
5  
6  
7  
8  
9 LLC. D. Ricciuto has received a grant from Astellas. M.Silverman has received speaker honoraria from  
10 Merck. The remainder of authors have no competing interests to declare.  
11  
12  
13  
14  
15  
16  
17  
18  
19  
20  
21  
22  
23  
24  
25  
26  
27  
28  
29  
30  
31  
32  
33  
34  
35  
36  
37  
38  
39  
40  
41  
42  
43  
44  
45  
46  
47  
48  
49  
50  
51  
52  
53  
54  
55  
56  
57  
58  
59  
60

Confidential

**Abstract**

**Background:** There is growing evidence that fecal microbiota transplantation (FMT) is a cost-effective treatment for recurrent *Clostridium difficile* infection. However, little guidance exists for implementation of FMT programs. This study summarizes the program characteristics and protocols of 9 planned or operating FMT programs in Southern Ontario (Southern Ontario Fecal microbiota Transplantation – SOFT- Movement), in order to inform FMT policy in Canada.

**Methods:** A 59-item survey was administered electronically to clinical leads of the SOFT Movement on June 2, 2016. Six domains were evaluated: 1) FMT program characteristics; 2) FMT recipients; 3) donor screening and selection; 4) FMT manufacturing; 5) FMT administration; 6) good manufacturing procedures/biosafety procedures; and, 7) infection control procedures. Descriptive statistics were used to analyze quantitative data.

**Results:** All nine programs responded to the survey. Of nearly 1300 FMT performed between 2003 and 2016 within these programs, most (5/6 operating programs) utilized enema administration. Programs were primarily driven by physicians. All programs used universal FMT donors and followed Health Canada screening guidelines, with significant variability in screening frequency (every 3 – 6 months) and modality. Locations for FMT preparation and manufacturing protocols were heterogeneous. FMT stool masses ranged from 20g to 150g and FMT volume, from 25mL to 300mL.

**Interpretation:** The experience of this high-volume, Canadian, regional FMT network highlights current challenges in program development, including a high reliance upon physicians and the costly nature of donor screening. Standardization and optimization through development of regional centers of excellence for FMT donor recruitment and administration should be explored.

## Introduction

Over the past decade, fecal microbiota transplantation (FMT) has emerged as a novel option for the treatment of recurrent *Clostridium difficile* infection (rCDI). To date, multiple randomized controlled trials have demonstrated that FMT using various methodologies is at least as effective if not superior to conventional antibiotic treatments for rCDI, and several cost-effectiveness analyses have demonstrated its value (1-10). However, for clinicians and centers considering offering FMT, little to no guidance exists on how to optimally approach program development. In part, this stems from a lack of accepted standards for FMT methodologies. Within FMT research, variables such as FMT patient selection, timing of FMT, FMT pre-treatment (with suppressive antibiotics and bowel lavage), donor selection, donor screening, FMT manufacturing and storage conditions, FMT route of administration, and number of FMT administrations have not been adequately standardized and validated (11, 12). The impact of heterogeneity in FMT methodologies on recipient outcome remains unclear.

In 2015, Health Canada issued brief, interim guidance regarding the use of FMT in patients with *C. difficile* infection (CDI) not responding to conventional treatment, focusing primarily on the safety aspects of donor selection and screening (13). While various expert bodies have produced guidelines for FMT that include further details on how to manufacture and perform FMT, these recommendations are predominantly based on expert opinion (14, 15). In the absence of evidence-informed guidance, individual centers in Canada offering the treatment have largely created their own protocols. The characteristics of Canadian FMT programs have not been summarized and widely shared.

In November 2015, the Southern Ontario Fecal microbiota Transplantation (SOFT) Movement was created with the dual purpose of sharing FMT experience between long-standing and new programs and removing barriers to FMT provision in Ontario, Canada. As an initial step, we performed an environmental scan of practices by surveying our members on FMT program characteristics and methodologies. Here, we describe the key features of FMT programs in Southern Ontario.

1  
2  
3  
4  
5  
6  
7  
8  
9  
10  
11  
12  
13  
14  
15  
16  
17  
18  
19  
20  
21  
22  
23  
24  
25  
26  
27  
28  
29  
30  
31  
32  
33  
34  
35  
36  
37  
38  
39  
40  
41  
42  
43  
44  
45  
46  
47  
48  
49  
50  
51  
52  
53  
54  
55  
56  
57  
58  
59  
60

## Methods

A 59-item survey on FMT program characteristics and protocols (Appendix 1) was developed by two study investigators (SH and SMP) and reviewed for content validity by a third investigator (BC). Open-ended and multiple-choice questions were used to evaluate the following domains: 1) FMT program characteristics; 2) FMT recipients; 3) donor screening and selection; 4) FMT manufacturing; 5) FMT administration; 6) good manufacturing procedures/biosafety procedures; and, 7) infection control procedures.

The survey was built using SurveyGizmo© and administered electronically on June 2, 2016. Twelve SOFT Movement members representing 9 hospital corporations in Southern Ontario (Figure 1) received the survey by email, with instructions to complete one survey per institution. One reminder email was sent. The data were analyzed using standard descriptive statistics on Microsoft Excel©. Consent to participate in this study was implicit to completing the survey. Institutional research ethics board approval was not deemed necessary as participation was voluntary, the survey did not request patient information or elicit personal opinions, and results were to be presented in aggregate.

## Results

All 9 institutions responded to the survey request, with 6 providing complete responses. One institution shared FMT standard operating procedures that were developed but did not have clinical experience to report. Two institutions were in the process of forming FMT programs and therefore provided incomplete or no survey responses.

### *FMT program characteristics*

Since 2003, approximately 1300 FMT have been administered across 6 institutions in Southern Ontario (Figure 1). The earliest program began in 2003, with the remainder of programs starting after 2008. Two programs had not yet launched their programs. One program performed FMT for clinical care only while

1  
2  
3  
4  
5  
6  
7  
8  
9 the other respondents planned or performed FMT for both clinical care and research purposes. Programs  
10 were all staffed by physicians, with five programs having inter-professional clinical support (program co-  
11 ordinator, clinical nurses and infectious diseases physician assistant) and two employing research staff  
12 (research nurse and summer student).  
13  
14

#### 15 *FMT recipients*

16  
17  
18 All active programs administered FMT for adult patients with CDI. One center additionally performed  
19 research into FMT for inflammatory bowel disease, another had planned or ongoing research on FMT for  
20 non-alcoholic fatty liver disease and multiple sclerosis and a third was planning research into FMT for  
21 obesity and bipolar depression. FMT indications used by the programs for CDI patients are summarized  
22 in Figure 2. Major exclusions for FMT recipients included: severe, uncontrollable diarrhea (n = 3); bloody  
23 diarrhea (n = 2); any immunocompromise (n = 1); neutropenia (n = 1), irreversible bleeding disorder (n =  
24 1). No center had an upper limit of age for FMT recipients.  
25  
26  
27  
28  
29  
30

#### 31 *Donor screening and selection*

32  
33 All surveyed programs used or planned to use universal FMT donors. At all sites, universal donors  
34 underwent screening at baseline. Five of the 7 institutions (71%) screened universal donors every 6  
35 months thereafter, while one institution screened every 3 months and another screened every 3 months  
36 and at the end of the donation cycle. Three programs performed microbiota analysis of the donor feces but  
37 none used these data as selection criteria for donors.  
38  
39  
40  
41

42 All programs applied the following suggested donor exclusions recommended by Health Canada: recent  
43 antibiotics; systemic immunosuppressive or biological agents; systemic antineoplastic agents; exogenous  
44 glucocorticoids; antidiarrheal drugs; mineral oil; bismuth; and kaolin. One program allowed magnesium  
45 consumption in donors. Additional exclusions used by all programs included a history of cancer, and by  
46 some programs, a history of chronic medical conditions, ongoing use of medications, and certain food  
47 consumptions depending on recipients' allergies.  
48  
49  
50  
51  
52

1  
2  
3  
4  
5  
6  
7  
8  
9  
10  
11  
12  
13  
14  
15  
16  
17  
18  
19  
20  
21  
22  
23  
24  
25  
26  
27  
28  
29  
30  
31  
32  
33  
34  
35  
36  
37  
38  
39  
40  
41  
42  
43  
44  
45  
46  
47  
48  
49  
50  
51  
52  
53  
54  
55  
56  
57  
58  
59  
60

Figure 3, which lists Health Canada-recommended donor exclusion criteria, summarizes the infectious diseases laboratory screening modalities used by programs to adhere to these guidelines. A significant proportion of infectious diseases screening occurred through reference laboratories. Gastroenteritis (diarrhea) due to agents not directly screened for in laboratory tests (e.g. *Listeria*), malaria, Chagas disease, babesiosis, Creutzfeld-Jacob disease and other prion disease exclusions were derived from medical assessment in all cases, with one center also performing laboratory testing for malaria. Although not specifically recommended by Health Canada, 71% and 57% of programs additionally screened for carbapenemase-producing *Enterobacteriaceae* and extended spectrum beta-lactamase-producing organisms.

#### *FMT manufacturing*

Three (3/6) active programs manufactured FMT within a clinical microbiology laboratory, 2 performed these steps in a research laboratory and one used a shared clinical/research space. In 3 programs, a physician manufactured the FMT all or some of the time; in other programs, FMT manufacturing involved a: nurse (n=1); laboratory technologists (n=1); research technologist (n=1), PhD microbiologist (n=1) or physician assistant (n=1).

Four (4/7) respondents undertook manufacturing validation studies prior to finalizing protocols. The majority (4/7) recommended that donor feces be stored in household refrigerators prior to transporting to the FMT program. Most strived to manufacture FMT within 24 hours of donation, although 2 centers accepted samples up to 48 and 72 hours after donation.

There was a wide range of donor stool mass and diluent volume used in manufacturing FMT (Table 1). Diluents varied with 50% of programs using saline, 17% using water, and 33% using saline for FMT administered by enema and water for FMT administered by nasoduodenal/nasojejunal (ND/NJ). Six programs manufactured frozen FMT, with one institution additionally offering lyophilized FMT. Only



1  
2  
3  
4  
5  
6  
7  
8  
9 one program used a cryoprotectant (glycerol) in the frozen FMT product. When frozen, FMT was  
10 maintained at both -20°C and -80°C.  
11

### 12 *FMT administration*

13  
14  
15 The most common route of FMT administration was enema, with 3 programs offering FMT by enema  
16 alone, 1 providing enema and colonoscopy administration and 1 providing enema and ND/NJ  
17 administration. One institution performed FMT by ND/NJ route only.  
18  
19

20  
21 FMT was performed in either a clinic setting, inpatient room or day unit. FMT was most commonly  
22 administered by a physician (n = 5 programs), sometimes with assistance from a physician trainee,  
23 physician assistant, or nurse. In the majority of cases when FMT was being administered to patients with  
24 CDI, oral vancomycin therapy was stopped 24-48 hours before FMT, although one site stopped it 48-96  
25 hours prior and another, <24 hours before FMT. Only one program used a bowel preparation after  
26 stopping vancomycin before FMT administration. In those performing FMT by enema, 2 programs  
27 administered FMT once, 3 provided it up to 3 times and 1 provided more than 5 FMT if necessary. In the  
28 2 programs providing FMT by colonoscopy, a single administration was given. One program provided a  
29 single FMT by ND/NJ route-time while another provided up to 3 ND/NJ administrations. When multiple  
30 FMT administrations were given, they were most frequently given 2-4 days apart.  
31  
32

33  
34  
35 At 3 sites, patients were not routinely followed post-FMT, whereas 4 sites reported variable follow-up  
36 durations ranging from 1-36 months. For CDI, failure of FMT was based on return of CDI symptoms  
37 alone at 2 programs while 5 programs additionally required laboratory confirmation.  
38  
39

### 40 *Good manufacturing procedures/biosafety procedures*

41  
42 All programs manufactured FMT in a biosafety cabinet. Two programs used disposable equipment for  
43 manufacturing and the remainder disinfected the manufacturing equipment and space using a sporicidal  
44 agent.  
45  
46

1  
2  
3  
4  
5  
6  
7  
8  
9  
10  
11  
12  
13  
14  
15  
16  
17  
18  
19  
20  
21  
22  
23  
24  
25  
26  
27  
28  
29  
30  
31  
32  
33  
34  
35  
36  
37  
38  
39  
40  
41  
42  
43  
44  
45  
46  
47  
48  
49  
50  
51  
52  
53  
54  
55  
56  
57  
58  
59  
60

### *Infection control procedures*

Fluid-resistant gowns and gloves were used by all programs during FMT manufacturing and administration, while procedure masks and face shields were used variably. Shoe covers were only used during FMT administration at one institution. Four programs performed more than one FMT per day.

Between cases, two of these programs requested environmental services to disinfect rooms with a sporicidal agent; one relied on FMT program staff do this; and one only changed linens between cases.

All programs requested environmental services to disinfect rooms used for FMT with a sporicidal agent after the last or only procedure of the day was completed.

### **Interpretation**

We provide a comprehensive description of a high volume network of FMT programs in Canada.

National surveys of FMT practices in the UK and Ireland have focused primarily on identifying hospitals where FMT is offered, and analysing barriers to FMT uptake without detailing protocols for manufacturing and administration (16-18). Others have reported on the development of single-site FMT programs (19, 20) but to our knowledge, a larger scale comparison of protocols and practices between FMT programs has not been performed. Collectively, our programs have performed about 1300 FMT primarily on patients with rCDI, but programs are expanding to include other indications in the context of research. FMT is most commonly administered by enema, although colonoscopic and NJ administrations are also available. To date, no definite data supports one route of administration over another in terms of FMT efficacy for rCDI (3, 21-25).

With growing evidence to support the cost-effectiveness of FMT for rCDI, deregulation by Health Canada for this indication and increasing research applications of FMT for other health conditions, there has been renewed interest in FMT programs across Canada. In July 2016, Health Quality Ontario, an arms-length organization that advises the Ontario Ministry of Health and Long Term Care on quality in healthcare, made a recommendation for public funding of FMT for rCDI based on an independent review

1  
2  
3  
4  
5  
6  
7  
8  
9 of the cost-effectiveness of FMT and patient experience with rCDI (26). As individual centers and the  
10 provincial healthcare systems determine how to best structure and fund FMT programs, providing a view  
11 into current FMT programs can highlight successes and points of vulnerability.  
12  
13

14  
15 In Southern Ontario, FMT programs are heavily driven by physicians. While FMT by enema or NJ tube  
16 may be administered by other health practitioners such as nurses and physician assistants, a physician  
17 with expertise in gastroenterology, infectious diseases and/or microbiology is required to oversee the  
18 procedure, the donor screening steps and recipient follow-up. As there is currently no mechanism for  
19 compensating physicians for this service in Ontario, physicians are donating time and expertise to provide  
20 this needed service. Likewise, hospitals are absorbing costs associated with building and supporting FMT  
21 programs. A fair, transparent and cost-effective means for providing seamless service should be  
22 developed in order to facilitate access to FMT.  
23  
24  
25  
26  
27  
28

29 Universal FMT donors are widely employed in these programs, primarily to provide stool samples that  
30 are processed then frozen and banked for later use. This approach is cost-effective, validated (4, 27-29)  
31 and favorable in terms of logistics for providing FMT on demand. The optimal frequency for screening  
32 universal donors is not clear and variability exists among the surveyed programs. Comprehensive donor  
33 screening, as recommended by Health Canada, is expensive, and not all tests are readily available to all  
34 institutions. There remains a heavy reliance upon reference laboratories for specialized testing (eg. stool  
35 for ova and parasites, enteric viruses). In some cases, validated or reliable tests do not exist (eg. testing of  
36 stool for *Listeria*) yet medical assessment alone may not necessarily exclude the possibility of infection or  
37 carriage.  
38  
39  
40  
41  
42  
43  
44

45 FMT manufacturing is highly variable across sites. The total weight of stool used, the volume of diluent,  
46 and the method of preparation differed between programs. Locating a space for this task is a frequent  
47 barrier for FMT programs, and this has resulted in physicians using research laboratory space to  
48 manufacture a clinical therapeutic. The use of commercial systems that contain the FMT product and that  
49  
50  
51  
52

1  
2  
3  
4  
5  
6  
7  
8  
9  
10  
11  
12  
13  
14  
15  
16  
17  
18  
19  
20  
21  
22  
23  
24  
25  
26  
27  
28  
29  
30  
31  
32  
33  
34  
35  
36  
37  
38  
39  
40  
41  
42  
43  
44  
45  
46  
47  
48  
49  
50  
51  
52  
53  
54  
55  
56  
57  
58  
59  
60

can be carefully disinfected between uses is highly desirable for infection control but these approaches are associated with significant costs and therefore are inconsistently used. Disposable equipment may be one alternative to decrease manufacturing costs (4, 30) but further research into validating FMT manufacturing is needed. While some sites in our survey did undertake validation studies to support their manufacturing processes and storage conditions, no industry standard exists regarding metrics for validation studies.

Our study has limitations. The study sites may not represent all sites where FMT has been performed within our region. Two of the surveyed sites were in the process of developing FMT programs and survey response may not represent their final approaches. Finally, we aimed to simply describe the FMT programs and did not collect data on clinical outcome of FMT recipients, which would be important for guiding future recommendations for FMT programs.

In summary, our study has identified a significant diversity in practices for FMT within a circumscribed region of Ontario, Canada servicing 12 million people. Site-based FMT protocols are driven by multiple factors including costs, local administrative pressures and availability of screening tests and these barriers have limited FMT uptake (16-18). The two largest costs of FMT in the region are physician time for coordinating, manufacturing and administering FMT and FMT donor screening. While public funding for FMT is being explored, FMT costs in Ontario are currently absorbed by individual hospital budgets and research funding. In planning future FMT programs in Canada, opportunities for systems-wide efficiencies should be explored – such as creating regional centers of excellence for FMT donor recruitment and administration. A recently released European guidance document on FMT echoes these concepts, recommending implementation of a clinical governance that would oversee the administrative aspects of FMT programs and deal with any organizational barriers that may hinder their efficiency to deliver FMT to rCDI patients in need (15). Such an approach would concentrate expertise in FMT, ensure consistency in procedures and practices, enable trace-backs in the event of possible FMT-related adverse

1  
2  
3  
4  
5  
6  
7  
8  
9 events, and reduce the need for numerous institutions to introduce costly donor screening tests and  
10 equipment into laboratories.  
11

12  
13 **Acknowledgements** (none)  
14

15 **Author Contributions**  
16

17  
18 S. S. Hota and S. M. Poutanen. co-led the design of the study and the development of the survey. S. S.  
19 Hota drafted the manuscript and submitted it for publication. S. Surangiwala administered the survey and  
20 completed the initial analysis of data. A. Paterson. completed additional data analysis. B. Coburn  
21 reviewed and approved the survey prior to administration. The SOFT Movement includes physician leads  
22 of FMT programs in Southern Ontario as follows: B. Coburn (University Health Network), N. Daneman  
23 (Sunnybrook Health Sciences Centre), M. Downing (St. Joseph's Health Center – Toronto), C. Graham  
24 (Trillium Health Partners), S. S. Hota (University Health Network), J. Johnstone (Public Health Ontario,  
25 St. Joseph's Health Care - Toronto), C. Lee (St. Joseph's Healthcare - Hamilton), J. McCready (Michael  
26 Garron Hospital), E. O. Petrof (Kingston General Hospital), S. M. Poutanen (Sinai Health Center,  
27 University Health Network), J. Powis (Michael Garron Hospital), D. Ricciuto (Lakeridge Health), and M.  
28 Silverman (St. Joseph's Hospital - London). All SOFT Movement leads and authors reviewed the study  
29 data for integrity, provided feedback on results, contributed to manuscript preparation and approved the  
30 final draft. All authors agree to be accountable for the data presented within the manuscript.  
31  
32  
33  
34  
35  
36  
37  
38  
39  
40  
41  
42  
43  
44  
45  
46  
47  
48  
49  
50  
51  
52  
53  
54  
55  
56  
57  
58  
59  
60

1  
2  
3  
4  
5  
6  
7  
8  
9  
10  
11  
12  
13  
14  
15  
16  
17  
18  
19  
20  
21  
22  
23  
24  
25  
26  
27  
28  
29  
30  
31  
32  
33  
34  
35  
36  
37  
38  
39  
40  
41  
42  
43  
44  
45  
46  
47  
48  
49  
50  
51  
52  
53  
54  
55  
56  
57  
58  
59  
60**References**

- 1 Van Nood E, Vrieze A, Nieuwdorp M, et al. Duodenal infusion of donor feces for recurrent *Clostridium difficile*. *N Engl J Med* 2013; 368: 407-415.
- 2 Cammarota G, Masucci L, Ianiro G, et al. Randomized clinical trial: faecal microbiota transplantation by colonoscopy vs vancomycin for the treatment of recurrent *Clostridium difficile* infection. *Aliment Pharmacol Ther* 2015; 41: 835-843.
- 3 Youngster I, Sauk J, Pindar C et al. Fecal microbiota transplant for relapsing *Clostridium difficile* infection using a frozen inoculum from unrelated donors: a randomized, open-label, controlled pilot study. *Clin Infect Dis* 2014; 58: 1515-1522.
- 4 Lee CH, Steiner T, Petrof EO et al. Frozen vs fresh fecal microbiota transplantation and clinical resolution of diarrhea in patients with recurrent *Clostridium difficile* infection: a randomized clinical trial. *JAMA* 2016; 315:142-149.
- 5 Kelly CR, Khoruts A, Staley C et al. Effect of fecal microbiota transplantation on recurrence in multiply recurrent *Clostridium difficile* infection. *Ann Intern Med* 2016;165: 609-16.
- 6 Hota SS, Sales V, Tomlinson G, et al. Oral Vancomycin Followed by Fecal Transplantation Versus Tapering Oral Vancomycin Treatment for Recurrent *Clostridium difficile* Infection: An Open-Label, Randomized Controlled Trial. *Clin Infect Dis* 2017; 64: 265-71.
- 7 Konijeti GG, Sauk J, Shrimel MG, Gupta M, Ananthakrishnan AN. Cost-effectiveness of competing strategies for management of recurrent *Clostridium difficile* infection: a decision analysis. *Clin Infect Dis* 2014; 58: 1507-14.
- 8 Varier RU, Biltaji E, Smith KJ et al. Cost-effectiveness analysis of fecal microbiota transplantation for recurrent *Clostridium difficile* infection. *Infect Control Hosp Epidemiol* 2015; 36: 438-44.
- 9 Baro E, Galperine T, Denies F et al. Cost-effectiveness analysis of five competing strategies for the management of multiple recurrent community-onset *Clostridium difficile* infection in France. *PLOS One* 2017; 12: e0170258. doi: 10.1371/journal.pone.0170258.

- 1  
2  
3  
4  
5  
6  
7  
8  
9 10 LaPointe-Shaw L, Tran KL, Coyte PC et al. Cost-effectiveness analysis of six strategies  
10 to treat recurrent *Clostridium difficile* infection. *PLOS One* 2016; 11: e0149521. doi:  
11 10.1371/journal.pone.0149521.  
12  
13  
14 11 Hota SS, Tomlinson G, Poutanen SM. Reply to Galperine and Jensen. *Clin Infect Dis* 2017; 64:  
15 1293-5.  
16  
17  
18 12 Kassam Z, Lee CH, Hunt RH. Review of the emerging treatment of *Clostridium difficile*  
19 infection with fecal microbiota transplantation and insights into future challenges. *Clin Lab Med*  
20 2014; 34: 787-798.  
21  
22  
23 13 Health Canada. Guidance document: Fecal microbiota therapy used in the treatment of  
24 *Clostridium difficile* infection not responsive to conventional therapies. Available at:  
25 [http://www.hc-sc.gc.ca/dhp-mps/consultation/biolog/fecal\\_microbiota-bacterio\\_fecale-eng.php](http://www.hc-sc.gc.ca/dhp-mps/consultation/biolog/fecal_microbiota-bacterio_fecale-eng.php).  
26  
27 Accessed 6 May 2016.  
28  
29  
30 14 Bakken J, Borody T, Brandt L et al. Treating recurrent *Clostridium difficile* infection with fecal  
31 microbiota transplantation. *Clin Gastroenterol and Hepatol*. 2011; 9: 1044-9.  
32  
33  
34 15 Cammarota G, Ianiro G, Tilg H et al. European consensus conference on fecal microbiota  
35 transplantation in clinical practice. *Gut* 2017; 66: 569-80.  
36  
37  
38 16 Porter RJ, Fogg C. Faecal microbiota transplantation for *Clostridium difficile* infection in the  
39 United Kingdom. *Clin Microbiol Infect* 2015; 21: 578-82.  
40  
41  
42 17 Prior AR, Kevans D, McDowell L, Cudmore S, Fitzpatrick F. Treatment of *Clostridium difficile*  
43 infection: a national survey of clinician recommendations and the use of faecal microbiota  
44 transplantation. *J Hosp Infect* 2017; 95: 438-441.  
45  
46  
47 18 Quraishi MN, Segal J, Mullish B et al. National survey of practice of faecal microbiota  
48 transplantation for *Clostridium difficile* infection in the UK. *J Hosp Infect* 2017; 95: 442-6.  
49  
50  
51  
52  
53  
54  
55  
56  
57  
58  
59  
60

- 1  
2  
3  
4  
5  
6  
7  
8  
9 19 Costello SP, Tucker EC, La Brooy J, Schoeman MN, Andrews JM. Establishing a fecal  
10 microbiota transplantation service for the treatment of *Clostridium difficile* infection. *Clin Infect*  
11 *Dis* 2016; 62: 908-14.  
12  
13  
14 20 Tauxe WM, Dhere T, Ward A, Rasca LD, Varkey JB, Kraft CS. Fecal microbiota transplant  
15 protocol for *Clostridium difficile* infection. *Lab Med* 2015; 46: e19-e23.  
16  
17  
18 21 Kassam Z, Lee CH, Yuan Y et al. Fecal microbiota transplantation for *Clostridium difficile*  
19 infection: Systematic review and meta-analysis. *Am J Gastroenterol* 2013; 108: 500-508.  
20  
21 22 Guo B, Harstall C, Louie T, et al. Systematic review: Faecal transplantation for the treatment of  
22 *Clostridium difficile*-associated disease. *Aliment Pharmacol Ther* 2012; 35: 865-875.  
23  
24 23 Gough E, Shaikh H, Manges AR. Systematic review of intestinal microbiota transplantation  
25 (fecal bacteriotherapy) for recurrent *Clostridium difficile* infection. *Clin Infect Dis* 2011; 53: 994-  
26 1002.  
27  
28  
29 24 Cammarota G, Ianiro G, Gasbarrini A. Fecal microbiota transplantation for the treatment of  
30 *Clostridium difficile* infection: a systematic review. *J Clin Gastroenterol*, **2014**; 48: 693-702.  
31  
32 25 Drekonja D, Reich J, Gezahegn S, et al. Fecal microbiota transplantation for *Clostridium difficile*  
33 infection: A systematic review. *Ann Int Med*, **2015**; 162: 630-638.  
34  
35  
36 26 Health Quality Ontario. Fecal microbiota therapy for *Clostridium difficile* infection: A health  
37 technology assessment. *Ont Health Technol Assess Ser* [Internet]. 2016 July; 16 (17): 1-69.  
38 Available at [http://www.hqontario.ca/evidence-to-improve-care/journal-ontario-health-](http://www.hqontario.ca/evidence-to-improve-care/journal-ontario-health-technology-assessment-series)  
39 [technology-assessment-series](http://www.hqontario.ca/evidence-to-improve-care/journal-ontario-health-technology-assessment-series). Accessed on July 18, 2017.  
40  
41  
42 27 Hamilton MJ, Weingardent AR, Sadowsky MJ, Khoruts A. Standardized frozen preparation for  
43 transplantation of fecal microbiota for recurrent *Clostridium difficile* infection. *Am J*  
44 *Gastroenterol* 2012; 102: 761-7.  
45  
46  
47 28 Tanga G, Yin W, and Liu W. Is frozen fecal microbiota transplantation as effective as fresh fecal  
48 microbiota transplantation in patients with recurrent or refractory *Clostridium difficile* infection:  
49 A meta-analysis. *Diagn Micro and Inf Dis* 2017; 88: 322-29.  
50  
51  
52  
53  
54  
55  
56  
57  
58  
59  
60



- 1  
2  
3  
4  
5  
6  
7  
8  
9 29 Terveer EM, van Beurden YH, Goorhuis A et al. How to: Establish and run a stool bank. *Clin*  
10 *Micro and Infection* 2017. Available at <http://dx.doi.org/10.1016/j.cmi.2017.05.015>. Accessed on  
11 July 18, 2017.  
12  
13  
14 30 Perez E, Lee CH, Petrof EO. A Practical Method for Preparation of Fecal Microbiota  
15 Transplantation. *Methods Mol Biol* 2016; 1476: 259-67.  
16  
17  
18  
19  
20  
21  
22  
23  
24  
25  
26  
27  
28  
29  
30  
31  
32  
33  
34  
35  
36  
37  
38  
39  
40  
41  
42  
43  
44  
45  
46  
47  
48  
49  
50  
51  
52  
53  
54  
55  
56  
57  
58  
59  
60

Confidential

1  
2  
3  
4  
5  
6  
7  
8  
9  
10  
11  
12  
13  
14  
15  
16  
17  
18  
19  
20  
21  
22  
23  
24  
25  
26  
27  
28  
29  
30  
31  
32  
33  
34  
35  
36  
37  
38  
39  
40  
41  
42  
43  
44  
45  
46  
47  
48  
49  
50  
51  
52  
53  
54  
55  
56  
57  
58  
59  
60

Table 1. Range of donor stool mass and diluent volume used for fecal microbiota transplantation (FMT) manufacturing within the 7 SOFT Movement institutions with finalized protocols.

| Route of Administration | Range of mass of stool used (g) |     | Range of diluent used (mL) |     |
|-------------------------|---------------------------------|-----|----------------------------|-----|
|                         | Min                             | Max | Min                        | Max |
| Enema                   | 20                              | 100 | 25                         | 300 |
| Colonoscopy             | 30                              | 150 | 200                        | 300 |
| ND/NJ                   | 30                              | 100 | 70                         | 250 |

Confidential

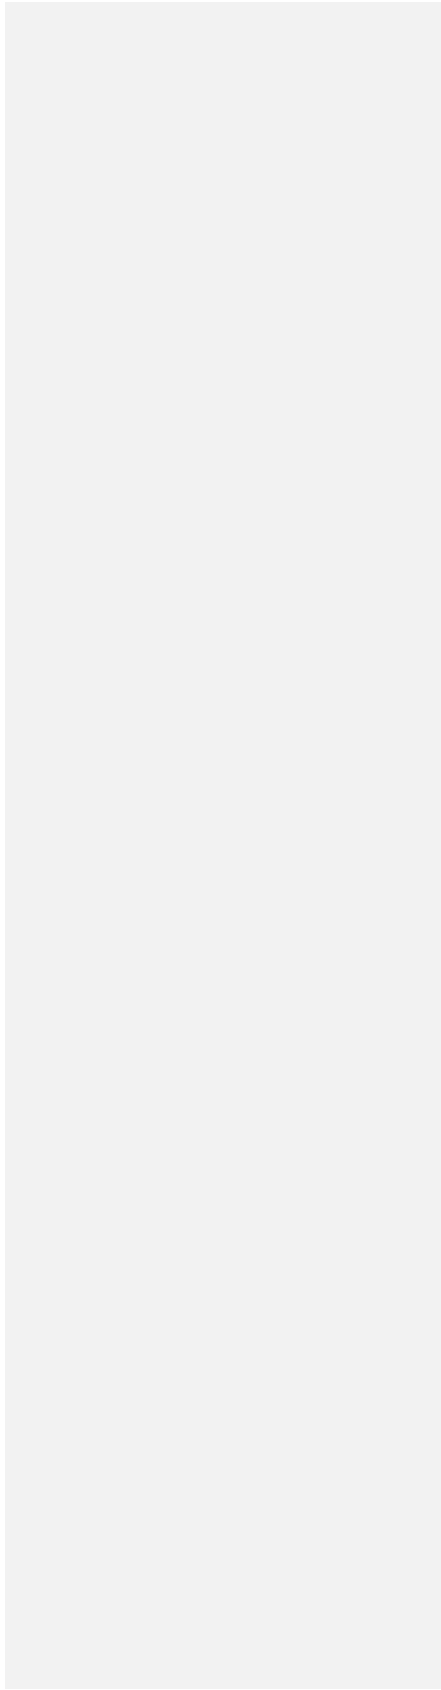

Figure 1. Location of fecal microbiota transplantation (FMT) programs in SOFT Movement, 2016

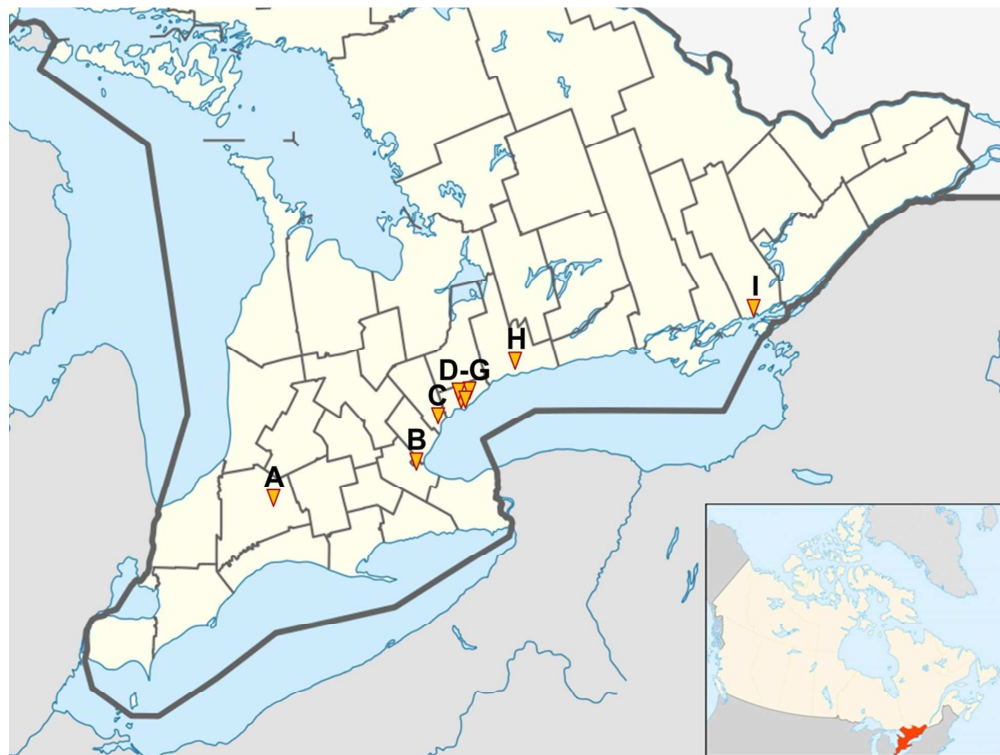

Formatted: Highlight

FMT programs included:

- A. St. Joseph's Hospital, London
- B. St. Joseph's Healthcare, Hamilton
- C. Trillium Health Partners, Mississauga
- D. University Health Network/Sinai Health System, Toronto
- E. Michael Garron Hospital, Toronto
- F. St. Joseph's Health Centre, Toronto\*
- G. Sunnybrook Health Science Centre, Toronto\*
- H. Lakeridge Health, Oshawa

1  
2  
3  
4  
5  
6  
7  
8  
9  
10  
11  
12  
13  
14  
15  
16  
17  
18  
19  
20  
21  
22  
23  
24  
25  
26  
27  
28  
29  
30  
31  
32  
33  
34  
35  
36  
37  
38  
39  
40  
41  
42  
43  
44  
45  
46  
47  
48  
49  
50  
51  
52  
53  
54  
55  
56  
57  
58  
59  
60

I. Kingston General Hospital, Kingston

\*Sunnybrook Health Sciences Centre and St. Joseph’s Health Centre (Toronto) were not operating at the time of the survey

Confidential



Figure 2. Proportion of the 7 operating SOFT Movement programs providing FMT to each of the following subgroups of patient *Clostridium difficile* infection (CDI) or recurrent CDI (rCDI)

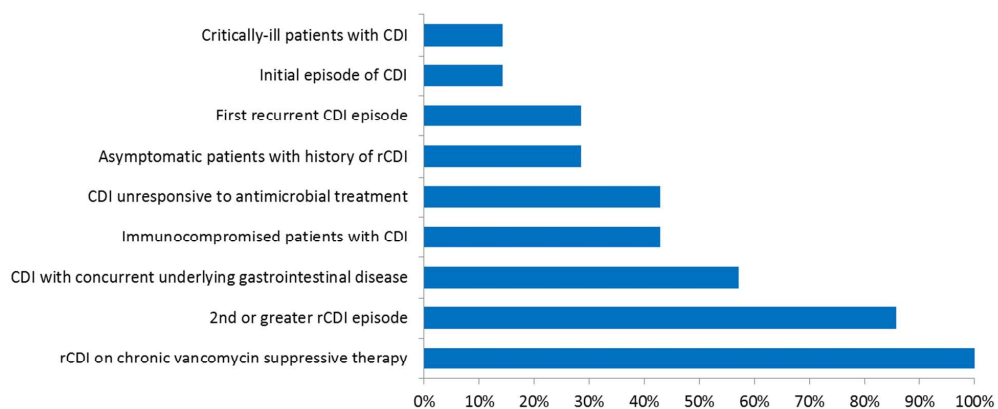

1  
2  
3  
4  
5  
6  
7  
8  
9  
10  
11  
12  
13  
14  
15  
16  
17  
18  
19  
20  
21  
22  
23  
24  
25  
26  
27  
28  
29  
30  
31  
32  
33  
34  
35  
36  
37  
38  
39  
40  
41  
42  
43  
44  
45  
46  
47  
48  
49  
50  
51  
52  
53  
54  
55  
56  
57  
58  
59  
60

Figure 3. Proportion of the 7 operating SOFT Movement programs completing laboratory testing for the infectious disease agents recommended by Health Canada

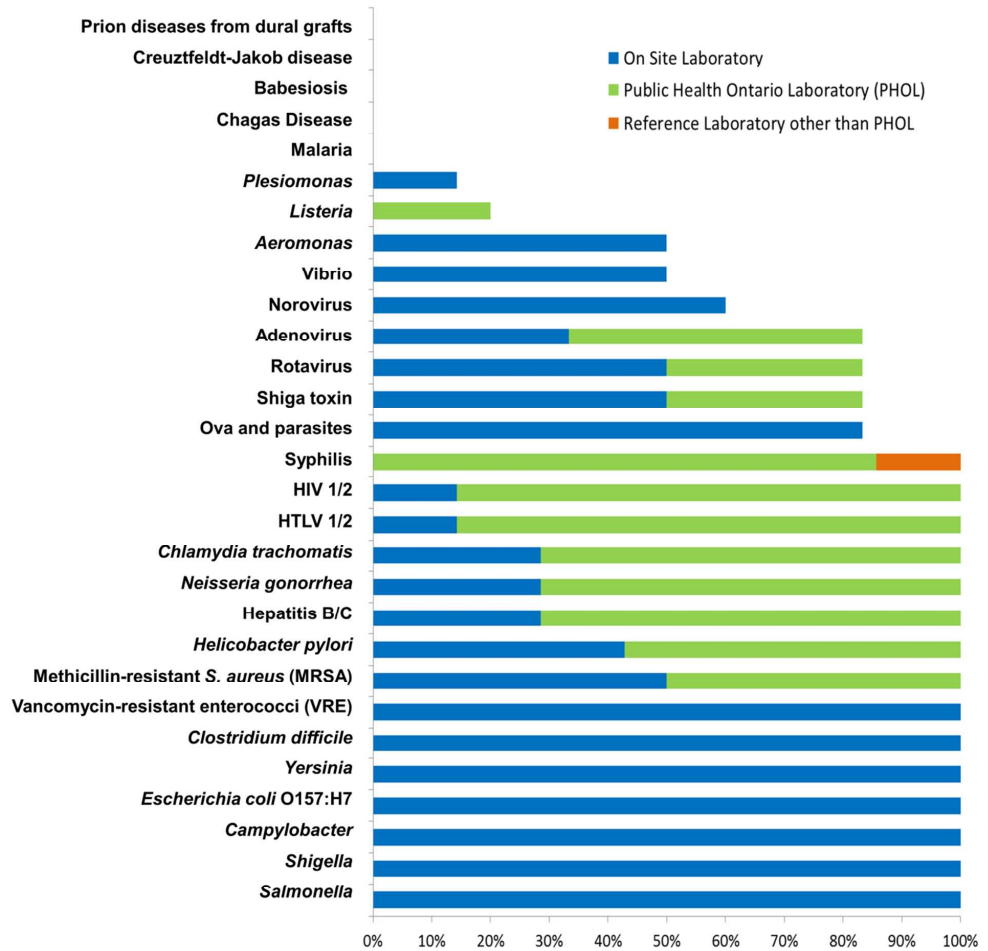

# SOFT Movement Survey of FMT Programs

---

## Part 1: General Information about your Fecal Microbiota Transplant (FMT) Program

1) Please fill out the information below:

First Name: \_\_\_\_\_

Last Name: \_\_\_\_\_

Title: \_\_\_\_\_

Please enter an email address we can use to communicate with you.:

\_\_\_\_\_

Please fill out the start date of this survey below.:

\_\_\_\_\_

2) Please enter the name of the institution and city where your FMT program is based:

Institution name: \_\_\_\_\_

City: \_\_\_\_\_

3) Have you begun performing FMTs at your location?

Yes

No

4) Approximately what year did you start performing FMT? If you have not, what year do you anticipate you will be starting to perform FMTs?

Please enter year: \_\_\_\_\_

Not applicable

5) If applicable, please enter the number of FMTs performed since the program started? If not applicable, please enter 0 (zero).

\_\_\_\_\_

1  
2  
3 **6) Have you performed FMT in the context of a research study, for clinical care or both?**

- 4  
5  
6  Research only  
7  
8  Clinical care only  
9  
10  Both

11 **7) Which approvals or endorsements did you require before starting your FMT**  
12 **program (check all that apply):**

- 13  
14  
15  Medical Advisory Committee  
16  
17  Hospital Senior Administrators  
18  
19  Research Ethics Board  
20  
21  Other (please specify): \_\_\_\_\_

22 **8) Approximately how long does it take for a patient to get a FMT from initial clinical**  
23 **assessment to first administration?**

- 24  
25  
26  < 1week  
27  
28  1-4 weeks  
29  
30  4-12 weeks  
31  
32  >12 weeks

33 **9) Aside from the persons who manufacture and administer FMT, who else supports the**  
34 **program and in what capacity (select all that apply and please list duties below)?**

- 35  
36  
37  Coordinator: \_\_\_\_\_  
38  
39  Clinical nurse: \_\_\_\_\_  
40  
41  Research nurse: \_\_\_\_\_  
42  
43  Trainee MD: \_\_\_\_\_  
44  
45  Students: \_\_\_\_\_  
46  
47  Volunteers: \_\_\_\_\_  
48  
49  Other (please specify): \_\_\_\_\_  
50  
51  Not applicable



---

**Part 2: Donor Selection and Screening**

**10) Please attach your Standard Operating Procedures for FMT donor screening (if available) below.**

Please attach on web survey

**11) Do you use universal FMT donors?**

Yes

No

**12) If you use universal FMT donors, how often do you screen them?**

Every month

Every 2 months

Every 3 months

Every 4 months

Every 5 months

Every 6 months

I do not use universal donors

Other (please specify): \_\_\_\_\_

**13) If you do not use universal FMT donors, when do you perform donor screening?**

Within 2 weeks of donation for FMT

Within 4 weeks of donation for FMT

Within 3 months of donation for FMT

Within 6 months of donation for FMT

Other (please specify): \_\_\_\_\_

**14) Do you perform microbiota analysis of donor feces?**

Yes

No

1  
2  
3 **15) If you perform microbiota analysis of donor feces, do you use this as part of your**  
4 **selection criteria for choosing donors?**  
5  
6

- 7  Yes  
8  No  
9  
10  Not applicable  
11

12 **16) Which of the following agents suggested by Health Canada do you use as exclusion**  
13 **criteria when screening donors for FMT?**  
14

- 15  
16  Systemic immunosuppressive or biological agents  
17  
18  Systemic antineoplastic agents  
19  
20  Exogenous glucocorticoids  
21  
22  Anti-diarrheal drugs  
23  
24  Mineral oil  
25  
26  Bismuth  
27  
28  Magnesium  
29  
30  Recent use of antibiotics (if yes, please specify your definition of recent use):  
31 \_\_\_\_\_  
32  
33  All of the above  
34

35 **17) Do you screen for additional agents not included in Health Canada's suggestions?**  
36

- 37  Yes (please specify): \_\_\_\_\_  
38  
39  No  
40  
41  
42  
43  
44  
45  
46  
47  
48  
49  
50  
51  
52  
53  
54  
55  
56  
57  
58  
59  
60

1  
2  
3 **18) Which of the following microorganisms or diseases suggested by Health Canada do you**  
4 **use as exclusion criteria routinely in FMT donors? (Enter all that apply)**  
5  
6

- 7  Cancer  
8  *Salmonella* species  
9  *Shigella*  
10  *Campylobacter*  
11  Sorbitol-negative *Escherichia coli* O157-H7  
12  Shiga toxin  
13  *Yersinia*  
14  *Plesiomonas*  
15  *Aeromonas*  
16  *Vibrio*  
17  *Listeria*  
18  *Helicobacter pylori*  
19  *Clostridium difficile*  
20  Vancomycin-resistant *enterococci* (VRE)  
21  Methicillin-resistant *Staphylococcus aureus* (MRSA)  
22  Syphilis  
23  *Neisseria gonorrhoea*  
24  *Chlamydia trachomatis*  
25  Norovirus  
26  Rotavirus  
27  Adenovirus  
28  HIV 1/2  
29  HTLV-I/II  
30  Hepatitis B/C  
31  Ova and parasites  
32  Malaria  
33  Chagas disease  
34  Babesiosis  
35  Creutzfeldt-Jakob disease  
36  Prion-related diseases from dural mater grafts  
37  All of the above  
38  
39  
40  
41  
42  
43  
44  
45  
46  
47  
48  
49  
50  
51  
52  
53  
54  
55  
56  
57  
58  
59  
60

## 19) What screening modality do you use to screen for the above microorganisms/diseases?

|                                                           | Risk factors | Medical assessment | Laboratory test             |                       |                                       | Test type<br>(please enter below if applicable) |
|-----------------------------------------------------------|--------------|--------------------|-----------------------------|-----------------------|---------------------------------------|-------------------------------------------------|
|                                                           | Risk factors | Medical assessment | Test performed at your site | Test performed at PHL | Test performed at site other than PHL |                                                 |
| <i>Salmonella</i> species                                 | [ ]          | [ ]                | —                           | —                     | —                                     | —                                               |
| <i>Shigella</i>                                           | [ ]          | [ ]                | —                           | —                     | —                                     | —                                               |
| <i>Campylobacter</i>                                      | [ ]          | [ ]                | —                           | —                     | —                                     | —                                               |
| Sorbitol-negative <i>Escherichia coli</i> 0157-H7         | [ ]          | [ ]                | —                           | —                     | —                                     | —                                               |
| Shiga toxin                                               | [ ]          | [ ]                | —                           | —                     | —                                     | —                                               |
| <i>Yersinia</i>                                           | [ ]          | [ ]                | —                           | —                     | —                                     | —                                               |
| <i>Plesiomonas</i>                                        | [ ]          | [ ]                | —                           | —                     | —                                     | —                                               |
| <i>Aeromonas</i>                                          | [ ]          | [ ]                | —                           | —                     | —                                     | —                                               |
| <i>Vibrio</i>                                             | [ ]          | [ ]                | —                           | —                     | —                                     | —                                               |
| <i>Listeria</i>                                           | [ ]          | [ ]                | —                           | —                     | —                                     | —                                               |
| <i>Helicobacter pylori</i>                                | [ ]          | [ ]                | —                           | —                     | —                                     | —                                               |
| <i>Clostridium difficile</i>                              | [ ]          | [ ]                | —                           | —                     | —                                     | —                                               |
| Vancomycin-resistant <i>enterococci</i> (VRE)             | [ ]          | [ ]                | —                           | —                     | —                                     | —                                               |
| Methicillin-resistant <i>Staphylococcus aureus</i> (MRSA) | [ ]          | [ ]                | —                           | —                     | —                                     | —                                               |

|                                                |                          |                          |   |   |   |   |
|------------------------------------------------|--------------------------|--------------------------|---|---|---|---|
| Syphilis                                       | <input type="checkbox"/> | <input type="checkbox"/> | — | — | — | — |
| <i>Neisseria gonorrhoea</i>                    | <input type="checkbox"/> | <input type="checkbox"/> | — | — | — | — |
| <i>Chlamydia trachomatis</i>                   | <input type="checkbox"/> | <input type="checkbox"/> | — | — | — | — |
| Norovirus                                      | <input type="checkbox"/> | <input type="checkbox"/> | — | — | — | — |
| Rotavirus                                      | <input type="checkbox"/> | <input type="checkbox"/> | — | — | — | — |
| Adenovirus                                     | <input type="checkbox"/> | <input type="checkbox"/> | — | — | — | — |
| HIV 1/2                                        | <input type="checkbox"/> | <input type="checkbox"/> | — | — | — | — |
| HTLV-I/II                                      | <input type="checkbox"/> | <input type="checkbox"/> | — | — | — | — |
| Hepatitis B/C                                  | <input type="checkbox"/> | <input type="checkbox"/> | — | — | — | — |
| Ova and parasites                              | <input type="checkbox"/> | <input type="checkbox"/> | — | — | — | — |
| Malaria                                        | <input type="checkbox"/> | <input type="checkbox"/> | — | — | — | — |
| Chagas disease                                 | <input type="checkbox"/> | <input type="checkbox"/> | — | — | — | — |
| Babesiosis                                     | <input type="checkbox"/> | <input type="checkbox"/> | — | — | — | — |
| Creutzfeldt-Jakob disease                      | <input type="checkbox"/> | <input type="checkbox"/> | — | — | — | — |
| Prion-related diseases from dural mater grafts | <input type="checkbox"/> | <input type="checkbox"/> | — | — | — | — |
| Cancer                                         | <input type="checkbox"/> | <input type="checkbox"/> | — | — | — | — |

20) Do you screen for any additional microorganisms or diseases not included by Health Canada suggestions?

Yes (please specify): \_\_\_\_\_

No

1  
2  
3 **21) Do you collect a dietary history of FMT donors in the event recipients have food**  
4 **allergies?**  
5  
6

7 () Yes

8 () No  
9

---

10  
11  
12 **Part 3: FMT Manufacturing**

13 **22) Please attach your Standard Operating Procedures for FMT manufacturing (if**  
14 **available) below.**

15  
16  
17 Please attach on web survey  
18

19  
20 **23) Where is FMT manufactured in your centre (select more than one if applies)?**

21  
22  
23  Clinical microbiology laboratory

24  Research laboratory

25  Pharmacy

26  Clinic

27  Other (please specify)  
28  
29

30  
31 **24) Who manufactures FMT (select all that apply)?**

32  MD

33  Trainee MD

34  Clinical nurse

35  Research nurse

36  Laboratory technologist

37  Clinical microbiology technologist/technician

38  Research technologist/technician

39  Other (please specify): \_\_\_\_\_  
40  
41  
42  
43  
44  
45  
46  
47  
48  
49  
50  
51  
52  
53  
54  
55  
56  
57  
58  
59  
60

25) Approximately what mass of donor stool do you use for each FMT (please select all that apply)?

|                         | 10g                      | 20g                      | 30g                      | 40g                      | 50g                      | 100g                     | 150g                     | Other amount<br>(please enter below) |
|-------------------------|--------------------------|--------------------------|--------------------------|--------------------------|--------------------------|--------------------------|--------------------------|--------------------------------------|
| Enema                   | <input type="checkbox"/> | <input type="checkbox"/> | <input type="checkbox"/> | <input type="checkbox"/> | <input type="checkbox"/> | <input type="checkbox"/> | <input type="checkbox"/> | ___                                  |
| Colonoscopy             | <input type="checkbox"/> | <input type="checkbox"/> | <input type="checkbox"/> | <input type="checkbox"/> | <input type="checkbox"/> | <input type="checkbox"/> | <input type="checkbox"/> | ___                                  |
| Nasogastric/nasojejunal | <input type="checkbox"/> | <input type="checkbox"/> | <input type="checkbox"/> | <input type="checkbox"/> | <input type="checkbox"/> | <input type="checkbox"/> | <input type="checkbox"/> | ___                                  |

26) Approximately what volume of diluent do you use for each FMT (check all that apply if more than one route of administration at your center)?

|                         | 25mL                     | 50mL                     | 100mL                    | 150mL                    | 200mL                    | 300mL                    | 400mL                    | 500mL                    | Other amount<br>(please enter below) |
|-------------------------|--------------------------|--------------------------|--------------------------|--------------------------|--------------------------|--------------------------|--------------------------|--------------------------|--------------------------------------|
| Enema                   | <input type="checkbox"/> | <input type="checkbox"/> | <input type="checkbox"/> | <input type="checkbox"/> | <input type="checkbox"/> | <input type="checkbox"/> | <input type="checkbox"/> | <input type="checkbox"/> | ___                                  |
| Colonoscopy             | <input type="checkbox"/> | <input type="checkbox"/> | <input type="checkbox"/> | <input type="checkbox"/> | <input type="checkbox"/> | <input type="checkbox"/> | <input type="checkbox"/> | <input type="checkbox"/> | ___                                  |
| Nasogastric/nasojejunal | <input type="checkbox"/> | <input type="checkbox"/> | <input type="checkbox"/> | <input type="checkbox"/> | <input type="checkbox"/> | <input type="checkbox"/> | <input type="checkbox"/> | <input type="checkbox"/> | ___                                  |

27) What type of diluent do you use for FMT?

Tap water

Sterile water

Sterile normal saline

Other (please specify): \_\_\_\_\_

1  
2  
3 **28) What form of FMT do you manufacture (select all that apply)?**  
4

- 5  Fresh  
6  
7  Frozen  
8  
9  Capsules  
10  
11  Lyophilized (freeze-dried)  
12  
13  Other (please specify): \_\_\_\_\_  
14

15 **29) What are your recommended storage conditions for donor feces prior to FMT**  
16 **manufacturing?**  
17

- 18  Household freezer  
19  
20  Household fridge  
21  
22  Room temperature  
23  
24  Other (please specify): \_\_\_\_\_  
25

26 **30) How long do you allow donor feces to be stored prior to delivery to your unit for FMT**  
27 **manufacturing?**  
28

- 29  Up to 24 hour  
30  
31  Up to 48 hour  
32  
33  Up to 72 hour  
34  
35  Other (please specify): \_\_\_\_\_  
36

37 **31) What storage conditions for donor feces do you use after receiving donor feces for FMT**  
38 **manufacturing?**  
39

- 40  Room temperature  
41  
42  4-5C  
43  
44  -20C  
45  
46  -80C  
47  
48  Other (please specify): \_\_\_\_\_  
49  
50  
51  
52  
53  
54  
55  
56  
57  
58  
59  
60



1  
2  
3 **32) How long do you allow donor feces to be stored in your unit before manufacturing for**  
4 **FMT?**  
5  
6

- 7  A few hours  
8  A few hours to 24 hours  
9  24-48 hours  
10  48-72 hours  
11  Other (please specify): \_\_\_\_\_  
12  
13  
14  
15

16 **33) If you use frozen FMT, which cryoprotectant do you use?**  
17

- 18  Glycerol (please enter concentration in final FMT):  
19 \_\_\_\_\_  
20  
21  Other (please specify): \_\_\_\_\_  
22  
23  No cryoprotectant  
24  Not applicable  
25  
26

27 **34) If you use frozen FMT, at what temperature is the sample frozen?**  
28

- 29  -20C  
30  -80C  
31  Other (please specify): \_\_\_\_\_  
32  
33  Not applicable  
34  
35  
36

37 **35) What is the maximum acceptable time from FMT donation to patient administration in**  
38 **your institution?**  
39

- 40  3 hours  
41  6 hours  
42  12 hours  
43  24 hours  
44  48 hours  
45  96 hours  
46  >96 hours  
47  Not applicable  
48  
49  
50  
51  
52  
53  
54  
55  
56  
57  
58  
59  
60

1  
2  
3 **36) Did you undertake any manufacturing validation studies prior to starting your FMT**  
4 **program?**  
5

- 6  
7 () Yes  
8  
9 () No

10  
11 **37) What are your rejection criteria for donor stools at the time of donation (select all that**  
12 **apply)?**  
13

- 14 [] Clinical criteria only (donor has active fever, diarrhea etc.)  
15  
16 [] Unformed stool provided for donation  
17  
18 [] Urine mixed in donated stools  
19  
20 [] Mucous in donated stools  
21  
22 [] Insufficient quantity of donated stools  
23  
24 [] Blood in donated stools (if so, do you do Fecal Occult Blood Testing?):  
25 \_\_\_\_\_

26 [] Other (please specify): \_\_\_\_\_  
27  
28  
29  
30  
31 \_\_\_\_\_  
32

33 **Part 4: Good Manufacturing/Biosafety Procedures**  
34

35 **38) Do you manufacture FMT in a biosafety cabinet?**  
36

- 37 () Yes  
38  
39 () No  
40

41 **39) How do you disinfect your manufacturing equipment (select all that apply)?**  
42

- 43 [] Disinfect with sporicidal agent pre- and post-FMT  
44  
45 [] Disinfect with non-sporicidal disinfectant pre- and post-FMT  
46  
47 [] Use only disposable equipment for all manufacturing steps  
48  
49 [] Other (please specify)  
50  
51  
52  
53  
54  
55  
56  
57  
58  
59  
60

1  
2  
3 **40) What personal protective equipment is used by the FMT manufacturer (select all that**  
4 **apply)?**  
5  
6

7  Single pair of gloves

8  Double gloves

9  Fluid-resistant gown

10  Non-fluid-resistant gown

11  Procedure mask

12  Face shield

13  Hair coverings

14  Shoe protection

15  Other (please specify): \_\_\_\_\_  
16  
17  
18  
19  
20  
21  
22  
23

---

24 **Part 5: Patients**

25  
26  
27 **41) For which of the follow conditions do you administer FMT?**  
28

29  *Clostridium difficile* infection

30  Inflammatory bowel disease

31  Irritable bowel syndrome

32  Other (please specify): \_\_\_\_\_  
33  
34  
35  
36

37 **42) To which of the following subgroups of *Clostridium difficile* infection (CDI) do you**  
38 **administer FMT (select all that apply)?**  
39

40  Initial episode of CDI as part of treatment for acute disease or immediately thereafter (ie.  
41 within 2 weeks of symptom-onset)

42  First recurrent CDI episode as part of treatment for acute disease or immediately thereafter  
43 (ie. within 2 weeks of symptom-onset)

44  Second or greater recurrent CDI episode(s) as part of treatment for acute disease or  
45 immediately thereafter (ie. within 2 weeks of symptom-onset)

46  Patients with a history of recurrent CDI after they have been treated and are asymptomatic off  
47 therapy (i.e. beyond 2 weeks of symptom onset)

48  Patients with a history of recurrent CDI on chronic suppressive oral vancomycin

49  Patients with CDI who are unresponsive to antimicrobial treatment

50  Critically-ill patients with CDI

51  Immunocompromised patients with CDI  
52  
53  
54  
55  
56  
57  
58  
59  
60

- Those with concurrent underlying GI disease with CDI
- Other (please specify): \_\_\_\_\_
- Not applicable

**43) What are your major exclusion criteria for FMT receipt (select all that apply)?**

- Age over 90 years
  - Immunocompromised status
  - Bleeding disorder (i.e. irreversible)
  - Severe, uncontrollable diarrhea
  - Bloody diarrhea
  - Other (please specify): \_\_\_\_\_
- 

**Part 6: Clinical Procedures for FMT Administration**

**44) Please attach your Standard Operating Procedures for FMT administration (if available) below.**

Please attach on web survey

**45) Where do you perform FMT (select all that apply)?**

- Clinic room
- Day unit
- Inpatient room
- Outside of hospital
- Other (please specify): \_\_\_\_\_

**46) Who administers FMT to patients (select all that apply)?**

- MD
- Trainee MD
- Nurse
- Other (please specify): \_\_\_\_\_

**47) How long before FMT do you stop oral vancomycin (or other antibiotic) if a patient is on treatment/suppression?**

- 1  
2  
3  
4  
5  
6  
7  
8  
9  
10  
11  
12  
13  
14  
15  
16  
17  
18  
19  
20  
21  
22  
23  
24  
25  
26  
27  
28  
29  
30  
31  
32  
33  
34  
35  
36  
37  
38  
39  
40  
41  
42  
43  
44  
45  
46  
47  
48  
49  
50  
51  
52  
53  
54  
55  
56  
57  
58  
59  
60
- ( ) <24 hours  
( ) 24-48 hours  
( ) 48-96 hours  
( ) >96 hours  
( ) Not applicable

**48) What route(s) of administration do you use for FMT?**

- [ ] Enema  
[ ] Colonoscopy  
[ ] Nasogastric/nasojejunal tube  
[ ] Other (please specify): \_\_\_\_\_

**49) On average, how long does the FMT procedure take?**

|                         | <10minutes | 10-30 minutes | 30-60 minutes | >60 minutes | Not applicable |
|-------------------------|------------|---------------|---------------|-------------|----------------|
| Enema                   | [ ]        | [ ]           | [ ]           | [ ]         | [ ]            |
| Colonoscopy             | [ ]        | [ ]           | [ ]           | [ ]         | [ ]            |
| Nasogastric/nasojejunal | [ ]        | [ ]           | [ ]           | [ ]         | [ ]            |

**50) How many FMTs do you perform per patient?**

|                         | Only 1 | Up to 3 | Up to 5 | >5 if necessary | Not applicable |
|-------------------------|--------|---------|---------|-----------------|----------------|
| Enema                   | [ ]    | [ ]     | [ ]     | [ ]             | [ ]            |
| Colonoscopy             | [ ]    | [ ]     | [ ]     | [ ]             | [ ]            |
| Nasogastric/nasojejunal | [ ]    | [ ]     | [ ]     | [ ]             | [ ]            |

1  
2  
3  
4  
5  
6  
7  
8  
9  
10  
11  
12  
13  
14  
15  
16  
17  
18  
19  
20  
21  
22  
23  
24  
25  
26  
27  
28  
29  
30  
31  
32  
33  
34  
35  
36  
37  
38  
39  
40  
41  
42  
43  
44  
45  
46  
47  
48  
49  
50  
51  
52  
53  
54  
55  
56  
57  
58  
59  
60

**51) If you administer multiple FMTs per patient, what is the frequency of FMT?**

|                         | Daily                    | Every 2-4 days           | Every 4-7 days           | Weekly                   | Every 10-14 days         | Other (please enter a value below) | Not applicable |
|-------------------------|--------------------------|--------------------------|--------------------------|--------------------------|--------------------------|------------------------------------|----------------|
| Enema                   | <input type="checkbox"/> | <input type="checkbox"/> | <input type="checkbox"/> | <input type="checkbox"/> | <input type="checkbox"/> | ___                                | ( )            |
| Colonoscopy             | <input type="checkbox"/> | <input type="checkbox"/> | <input type="checkbox"/> | <input type="checkbox"/> | <input type="checkbox"/> | ___                                | ( )            |
| Nasogastric/nasojejunal | <input type="checkbox"/> | <input type="checkbox"/> | <input type="checkbox"/> | <input type="checkbox"/> | <input type="checkbox"/> | ___                                | ( )            |

**52) What are your criteria for failure of FMT?**

- ( ) Return of CDI symptoms  
 ( ) Return of CDI symptoms and laboratory confirmation  
 ( ) Other (please specify): \_\_\_\_\_

**53) What is your routine follow-up post-FMT?**

- ( ) I only see post-FMT patient's as needed, if they have concerns  
 ( ) I see post-FMT patients regularly, at the following time points (other please specify)::  
 \_\_\_\_\_

**54) Do you perform microbiota analysis of FMT recipient feces prior to FMT administration?**

- ( ) Yes  
 ( ) No

**55) Do you perform microbiota analysis of FMT recipient feces following FMT administration?**

- ( ) Yes (please specify frequency): \_\_\_\_\_  
 ( ) No

---

**Part 7: Infection Control Procedures**

**56) What personal protective equipment is worn by the individual administering FMT (select all that apply)?**

Single pair of gloves

Double gloves

Fluid-resistant gown

Non-fluid-resistant gown

Procedure mask

Face shield

Hair coverings

Shoe protection

Other (please specify): \_\_\_\_\_

**57) How is the FMT procedure room/area disinfected between FMTs, if multiple FMTs are scheduled back to back?**

I never have more than one FMT in a day

Wipe down with non-sporicidal hospital disinfectant by FMT team

Wipe down with sporicidal disinfectant by FMT team

Cleaning by housekeeping staff using non-sporicidal hospital disinfectant

Cleaning by housekeeping staff using sporicidal disinfectant

Other (please specify): \_\_\_\_\_

**58) How is the FMT procedure room/area disinfected after FMT procedures are done for the day?**

Wipe down with non-sporicidal disinfectant by FMT team

Wipe down with sporicidal disinfectant by FMT team

Cleaning by housekeeping staff using non-sporicidal disinfectant

Cleaning by housekeeping staff using sporicidal disinfectant

Other (please specify): \_\_\_\_\_

---

1  
2  
3  
4  
5  
6  
7  
8  
9  
10  
11  
12  
13  
14  
15  
16  
17  
18  
19  
20  
21  
22  
23  
24  
25  
26  
27  
28  
29  
30  
31  
32  
33  
34  
35  
36  
37  
38  
39  
40  
41  
42  
43  
44  
45  
46  
47  
48  
49  
50  
51  
52  
53  
54  
55  
56  
57  
58  
59  
60

**Remarks**

**59) Do you have any other questions/comments/concerns to share?**

---

---

---

---

**Thank You!**

Confidential
